# Supplementary material
Source: HighWire-hosted journal article supplement (doi:10.1101/rna.046631.114)
Supplement: SuppFig_Tables.docx [file SuppFig_Tables.docx]

| Name | **Buffer Conditions** | **∆Ho**  **kcal/mol** | **∆So**  **eu** | **∆Go37**  **kcal/mol** | **Tm**  **oC,**  **1e-4 M** | **∆Ho**  **kcal/mol** | **∆So**  **eu** | **∆Go37**  **kcal/mol** | **Tm**  **oC,**  **1e-4 M** |
| --- | --- | --- | --- | --- | --- | --- | --- | --- | --- |
| **1/Tm vs ln Ct/4 Average from Curve Fit** | | | | | | | | | |
| A1 RNA | 1 mM MgCl2 | -103.3 ± 2.0 | -295.3 ± 6.1 | -11.74 ± 0.07 | 53.5 | -103.7 ± 2.4 | -296.3 ± 7.6 | -11.75 ± 0.07 | 53.4 |
|  | 3 mM MgCl2 | -89.0 ± 2.3 | -247.8 ± 7.0 | -12.19 ± 0.01 | 58.1 | -90.1 ± 1.2 | -251.2 ± 3.7 | -12.24 ± 0.07 | 58.0 |
|  |  |  |  |  |  |  |  |  |  |
| A2 RNA | 1 mM MgCl2 | -83.3 ± 3.2 | -238.4 ± 10.1 | -9.34 ± 0.04 | 47.8 | -77.7 ± 4.6 | -220.3 ± 14.8 | -9.33 ± 0.06 | 48.6 |
|  | 3 mM MgCl2 | -92.4 ±3.0 | -261.4 ± 9.3 | -11.36 ± 0.10 | 54.1 | -92.6 ± 2.8 | -261.9 ± 8.9 | -11.35 ± 0.10 | 54.0 |
|  |  |  |  |  |  |  |  |  |  |
| A3 RNA | 1 mM MgCl2 | -80.0 ± 4.3 | -228.2 ± 13.8 | -8.89 ± 0.07 | 46.5 | -78.1 ± 8.3 | -223.0 ± 26.7 | -8.91 ± 0.06 | 46.7 |
|  | 3 mM MgCl2 | -81.6 ± 2.9 | -230.1 ± 9.1 | -10.27 ± 0.6 | 51.9 | -81.3 ± 7.0 | -229.2 ± 22.3 | -10.24 ± 0.07 | 51.8 |
|  |  |  |  |  |  |  |  |  |  |
| A4 RNA | 1 mM MgCl2 | -72.3 ± 4.1 | -206.3 ± 13.2 | -8.27 ± 0.06 | 44.6 | -71.9 ± 4.4 | -205.1 ±14.1 | -8.27 ± 0.08 | 44.7 |
|  | 3 mM MgCl2 | -71.6 ± 3.6 | -199.9 ± 11.5 | -9.66 ± 0.07 | 51.1 | -68.5 ± 9.2 | -190.0 ± 29.6 | -9.68 ± 0.06 | 52.0 |
|  |  |  |  |  |  |  |  |  |  |
| A5 RNA | 1 mM MgCl2 | -73.8 ± 3.4 | -211.6 ± 11.0 | -8.17 ± 0.04 | 44.0 | -73.1 ± 8.4 | -209.5 ± 27.2 | -8.15 ± 0.06 | 44 |
|  | 3 mM MgCl2 | -69.9 ± 4.2 | -198.7 ± 13.4 | -9.54 ± 0.09 | 50.9 | -69.6 ± 4.2 | -193.7 ± 13.3 | -9.52 ± 0.07 | 50.9 |
|  |  |  |  |  |  |  |  |  |  |
| G2 RNA | 1 mM MgCl2 | -76.1 ± 4.1 | -215.4 ± 13.1 | -9.34 ± 0.08 | 48.9 | -73.4 ± 5.0 | -206.5 ± 16.2 | -9.35 ± 0.08 | 49.4 |
|  | 3 mM MgCl2 | -81.3 ± 2.4 | -226.7 ± 7.5 | -11.03 ± 0.07 | 55.1 | -77.6 ± 3.6 | -214.9 ± 11.4 | -10.94 ± 0.07 | 55.7 |
|  |  |  |  |  |  |  |  |  |  |
| G3 RNA | 1 mM MgCl2 | -79.1 ± 3.6 | -225.5 ± 11.7 | -9.17 ± 0.05 | 47.7 | -78.7 ± 3.0 | -224.3 ± 9.5 | -9.19 ± 0.06 | 47.8 |
|  | 3 mM MgCl2 | -89.1 ± 2.2 | -251.0 ± 6.8 | -11.28 ± 0.06 | 54.5 | -89.8 ± 3.2 | -253.2 ± 10.0 | -11.30 ± 0.07 | 54.4 |
|  |  |  |  |  |  |  |  |  |  |
| G4 RNA | 1 mM MgCl2 | -79.5 ± 4.1 | -228.8 ± 13.3 | -8.49 ± 0.05 | 44.8 | -72.2 ± 7.0 | -205.3 ± 22.3 | -8.54 ± 0.12 | 45.9 |
|  | 3 mM MgCl2 | -70.9 ± 3.8 | -196.6 ± 12.1 | -9.96 ± 0.09 | 52.7 | -71.7 ± 6.4 | -199.1 ± 20.5 | -9.98 ± 0.09 | 52.7 |
|  |  |  |  |  |  |  |  |  |  |
| RNA Helix | 1 mM MgCl2 | -98.3 ± 0.9 | -270.2 ± 2.7 | -14.53 ± 0.05 | 64.5 | -98.3 ± 0.7 | -258.1 ± 2.2 | -14.30 ± 0.04 | 64.8 |
|  | 3 mM MgCl2 | -95.8 ± 2.0 | -258.0 ± 5.8 | -15.75 ± 0.15 | 70.0 | -95.6 ± 1.5 | -257.6 ± 4.4 | -15.74 ± 0.11 | 70.0 |
|  |  |  |  |  |  |  |  |  |  |
| AAUA | 1 mM MgCl2 | -50.8 ± 1.8 | -139.8 ± 5.9 | -7.45 ± 0.05 | 42.7 | -52.3 ± 2.7 | -144.7 ± 8.8 | -7.42 ± 0.10 | 42.3 |
|  | 3 mM MgCl2 | -55.3 ± 2.0 | -150.5 ± 5.5 | -8.71 ± 0.02 | 49.7 | -53.5 ± 6.2 | -144.6 ± 20.2 | -8.68 ± 0.10 | 50.0 |
|  |  |  |  |  |  |  |  |  |  |
| AAUC | 1 mM MgCl2 | -55.3 ± 3.5 | -150.3 ± 11.4 | -8.66 ± 0.09 | 49.4 | -54.9 ± 5.4 | -149.0 ± 17.3 | -8.66 ± 0.07 | 49.5 |
|  | 3 mM MgCl2 | -58.4 ± 2.6 | -158.0 ± 8.2 | -9.35 ± 0.05 | 52.8 | -58.0 ± 4.3 | -156.9 ± 13.8 | -9.35 ± 0.07 | 52.9 |
|  |  |  |  |  |  |  |  |  |  |
| CCUA | 1 mM MgCl2 | -59.5 ± 2.0 | -167.9 ± 6.5 | -7.42 ± 0.05 | 41.7 | -58.5 ± 10.0 | -164.6 ± 32.3 | -7.47 ± 0.10 | 42.1 |
|  | 3 mM MgCl2 | -66.3 ± 1.9 | -185.0 ± 6.0 | -8.98 ± 0.02 | 48.9 | -62.8 ± 8.7 | -173.4 ± 28.0 | -8.96 ± 0.06 | 49.5 |
|  |  |  |  |  |  |  |  |  |  |
| CAUA | 1 mM MgCl2 | -46.2 ± 2.2 | -124.3 ± 7.5 | -7.67 ± 0.07 | 44.8 | -46.9 ± 6.4 | -126.3 ± 20.8 | -7.69 ± 0.09 | 44.9 |
|  | 3 mM MgCl2 | -60.0 ± 1.9 | -165.7 ± 6.3 | -8.64 ± 0.03 | 48.3 | -61.4 ± 6.0 | -170.3 ± 19.2 | -8.60 ± 0.06 | 47.8 |
|  |  |  |  |  |  |  |  |  |  |

Table S1: RNA Data in 1 and 3 mM MgCl2 buffer in pH 6.

| Name | Condition | ∆Ho37 kcal/mol | ∆So eu | ∆Go37 kcal/mol | Tm oC  1e-4 M | ∆Ho kcal/mol | ∆So eu | ∆Go37 kcal/mol | Tm oC  1e-4M MM |
| --- | --- | --- | --- | --- | --- | --- | --- | --- | --- |
| **1/Tm vs ln Ct/4 Average from Curve Fit** | | | | | | | | | |
| A1 DNA | 1 mM MgCl2 | -63.8 ± 2.5 | -180.0 ± 8.1 | -8.04 ±0.06 | 44.3 | -64.0 ± 5.2 | -180.3 ± 17.0 | -8.04 ± 0.06 | 44.5 |
|  |  |  |  |  |  |  |  |  |  |
| A2 DNA | 1 mM MgCl2 | -58.9 ± 1.7 | -167.6 ± 5.4 | -6.87 ± 0.05 | 38.8 | -65.0 ± 3.8 | -187.7 ± 12.2 | -6.73 ± 0.06 | 38.0 |
|  | 3 mM MgCl2 | -68.1 ± 4.4 | -191.1 ± 13.9 | -8.81 ± 0.08 | 47.7 | -68.7 ± 7.8 | -193.0 ± 25.2 | -8.87 ± 0.09 | 47.9 |
|  |  |  |  |  |  |  |  |  |  |
| A3 DNA | 3 mM MgCl2 | -72.2 ± 3.8 | -205.7 ± 12.3 | -8.40 ± 0.04 | 45.2 | -73.2 ± 8.4 | -208.6 ± 26.9 | -8.46 ± 0.05 | 45.4 |
|  |  |  |  |  |  |  |  |  |  |
| A4 DNA | 1 mM MgCl2 | -50.9 ± 2.8 | -144.4 ± 9.6 | -6.11 ± 0.15 | 34.4 | -54.0 ± 7.0 | -154.9 ± 23.5 | -6.00 ± 0.29 | 34 |
|  | 3 mM MgCl2 | -71.8 ± 3.3 | -205.3 ± 10.7 | -8.08 ± 0.05 | 43.8 | -70.4 ± 7.8 | -200.8 ± 25.5 | -8.14 ± 0.11 | 44.3 |
|  |  |  |  |  |  |  |  |  |  |
| A5 DNA | 1 mM MgCl2 | -53.4 ± 3.8 | -152.7 ± 12.8 | -6.03 ± 0.19 | 34.1 | -51.9 ± 1.3 | -147.6 ± 4.2 | -6.11 ± 0.09 | 34.5 |
|  | 3 mM MgCl2 | -72.3 ± 3.3 | -207.9 ± 10.7 | -7.76 ± 0.06 | 42.0 | -69.0 ± 4.8 | -197.1 ± 15.7 | -7.83 ± 0.10 | 43.0 |
|  |  |  |  |  |  |  |  |  |  |
| G1 DNA | 1 mM MgCl2 | -75.7 ± 1.9 | -216.4 ± 6.0 | -8.59 ± 0.02 | 45.7 | -75.6 ± 4.0 | -216.0 ± 12.9 | -8.59 ± 0.05 | 45.7 |
|  | 3 mM MgCl2 | -84.4 ± 3.3 | -239.0 ± 10.4 | -10.29 ± 0.09 | 51.4 | -84.2 ± 1.7 | -238.3 ± 5.3 | -10.29 ± 0.05 | 51.5 |
|  |  |  |  |  |  |  |  |  |  |
| G2 DNA | 1 mM MgCl2 | -58.4 ± 4.4 | -165.1 ± 14.5 | -7.14 ± 0.05 | 40.2 | -55.9 ±1.0 | -157.1 ± 3.1 | -7.14 ± 0.02 | 40.4 |
|  | 3 mM MgCl2 | -72.1 ± 7.2 | -204.3 ± 22.9 | -8.75 ± 0.09 | 46.8 | -74.8 ± 2.8 | -212.8 ± 8.9 | -8.75 ± 0.05 | 46.5 |
|  |  |  |  |  |  |  |  |  |  |
| G3 DNA | 1 mM MgCl2 | -57.5 ± 2.5 | -161.1 ± 8.3 | -7.51 ± 0.04 | 42.4 | -59.7 ± 6.4 | -168.2 ± 21.0 | -7.53 ± 0.07 | 42.3 |
|  | 3 mM MgCl2 | -73.2 ± 2.5 | -206.9 ± 8.1 | -9.06 ± 0.03 | 48.1 | -71.5 ± 8.1 | -201.2 ± 25.9 | -9.09 ± 0.05 | 48.5 |
|  |  |  |  |  |  |  |  |  |  |
| G4 DNA | 1 mM MgCl2 | -63.5 ± 3.0 | -182.3 ± 9.8 | -7.00 ± 0.08 | 39.4 | -63.4 ± 5.3 | -181.9 ± 17.1 | -7.03 ± 0.10 | 39.5 |
|  | 3 mM MgCl2 | -64.3 ± 4.8 | -179.4 ± 15.6 | -8.62 ± 0.09 | 47.4 | -67.0 ± 8.1 | -187.9 ± 26.2 | -8.70 ± 0.04 | 47.4 |
|  |  |  |  |  |  |  |  |  |  |
| G5 DNA | 1 mM MgCl2 | -59.3 ±1.9 | 169.4 ± 6.2 | -6.81 ± 0.06 | 38.5 | -56.7 ± 4.0 | -160.6 ± 13.2 | -6.89 ± 0.09 | 39.0 |
|  | 3 mM MgCl2 | -67.1 ± 3.7 | -188.6 ± 11.9 | -8.62 ± 0.05 | 47.0 | -65.0 ± 5.7 | -181.6 ± 18.4 | -8.64 ± 0.08 | 47.4 |

Table S2: DNA data in 1 mM and 3 mM MgCl2, pH 6.

**A B C**

Figure 1S: Representative melt curves showing the melt profile for G1 RNA bulge in A) 10 mM MgCl2, pH6 B) RNA helix in 1 M KCl, pH 6. C) Representative 1/Tm vs concentration plot for A3 RNA bulge loop in 3 mM MgCl2, pH 6.
